# Supplementary material
Source: Springer Nature journal article supplement (https://www.springermedizin.de/resource/supplementary/12931_2014_1493_MOESM3_ESM.pdf/9426320)

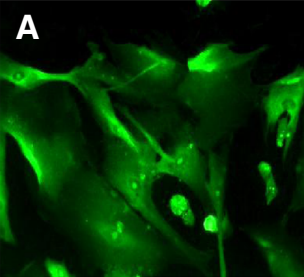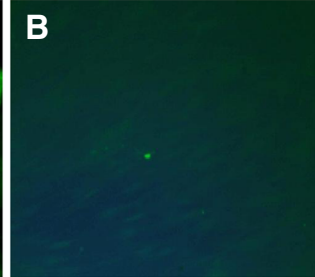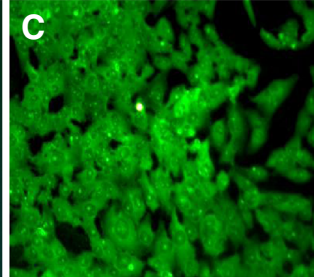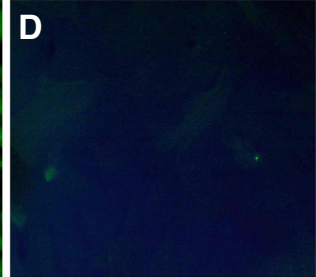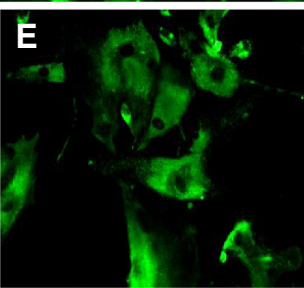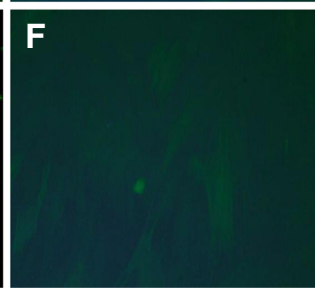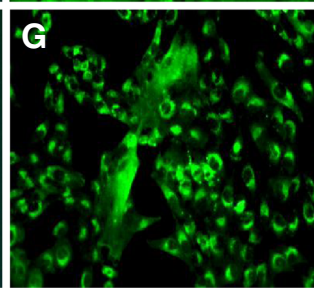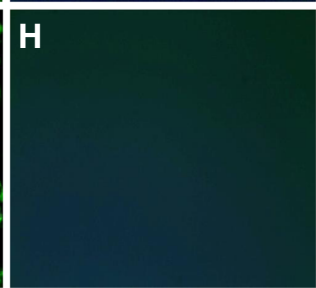

Supplement: MOESM3 [file 9426320]
